# Supplementary material for: Probing the water adsorption and stability under steam flow of Zr-based metal–organic frameworks using 91Zr solid-state NMR spectroscopy
Source: Royal Society of Chemistry journal article supplement (doi:10.1039/d4sc04589k), 2024-11-07
Supplement: d4sc04589k1.pdf [file d4sc04589k1.pdf]

Supporting information for

## Probing water adsorption and stability under steam flow of Zr-based metal-organic framework using $^{91}\text{Zr}$ solid-state NMR spectroscopy

Athulya Nadol<sup>a</sup>, Florian Venel<sup>a</sup>, Raynald Giovine<sup>a</sup>, Maëva Leloire<sup>a</sup>, Christophe Volkringer<sup>a</sup>, Thierry Loiseau<sup>a</sup>, Christel Gervais<sup>b</sup>, Caroline Mellot-Draznieks<sup>c</sup>, Bertrand Doumert<sup>d</sup>, Julien Trébosc<sup>d</sup>, Olivier Lafon<sup>a</sup>, Frédérique Pourpoint<sup>\*a</sup>

- Univ. Lille, CNRS, Centrale Lille, ENSCL, Univ. Artois, UMR 8181 – UCCS – Unité de Catalyse et Chimie du Solide, F-59000 Lille, France
- LCMCP, UMR 7475, Sorbonne Université, CNRS, F-75005 Paris, France
- Laboratoire de Chimie des Processus Biologiques (LCPB), CNRS UMR 8229, Collège de France, PSL University, Sorbonne Université, Paris 75231, France
- IMEC, Univ. Lille, CNRS, Centrale Lille, Univ. Artois, FR 2638, F-59000 Lille, France
- Institut Universitaire de France, 1, rue Descartes – 75231 Paris CEDEX 05, France

\*Corresponding author: [frederique.pourpoint@centralelille.fr](mailto:frederique.pourpoint@centralelille.fr)

| Section              | Content                                                                                      | page |
|----------------------|----------------------------------------------------------------------------------------------|------|
| Fig. S1              | Representation of the atomic-level structures of the three samples                           | 2    |
| Fig. S2              | Picture of the experimental set-up to measure and control the steam flow and the temperature | 3    |
| Fig. S3              | XRD                                                                                          | 4    |
| Fig. S4              | IR spectra                                                                                   | 5    |
| Fig. S5              | N <sub>2</sub> adsorption                                                                    | 6    |
| Fig. S6              | $^1\text{H} \rightarrow ^{13}\text{C}$ CPMAS NMR spectra                                     | 7    |
| Table S1             | Zr-O distances expected in the three samples according to the published CIF files            | 9    |
| Table S2             | Number of experimental echoes in the QCPMG                                                   | 9    |
| Fig. S7              | WURST-QCPMG added spectra of UiO-66                                                          | 10   |
| Fig. S8              | WURST-QCPMG added spectra of UiO-66-Fum                                                      | 11   |
| Fig. S9              | WURST-QCPMG added spectra of UiO-67-NH <sub>2</sub>                                          | 12   |
| Table S3<br>Fig. S10 | Simulations of $^{91}\text{Zr}$ using regular quadrupolar lineshape                          | 13   |
| Table S4<br>Fig. S11 | Calculated NMR parameters for UiO-66-Fum                                                     | 14   |
| Table S5<br>Fig. S12 | Calculated NMR parameters for UiO-66-Fum-H <sub>2</sub> O                                    | 15   |
| Table S6<br>Fig. S13 | Calculated NMR parameters for UiO-67-NH <sub>2</sub>                                         | 16   |
| Table S7<br>Fig. S14 | Calculated NMR parameters of reference compounds                                             | 17   |
|                      | References                                                                                   | 18   |

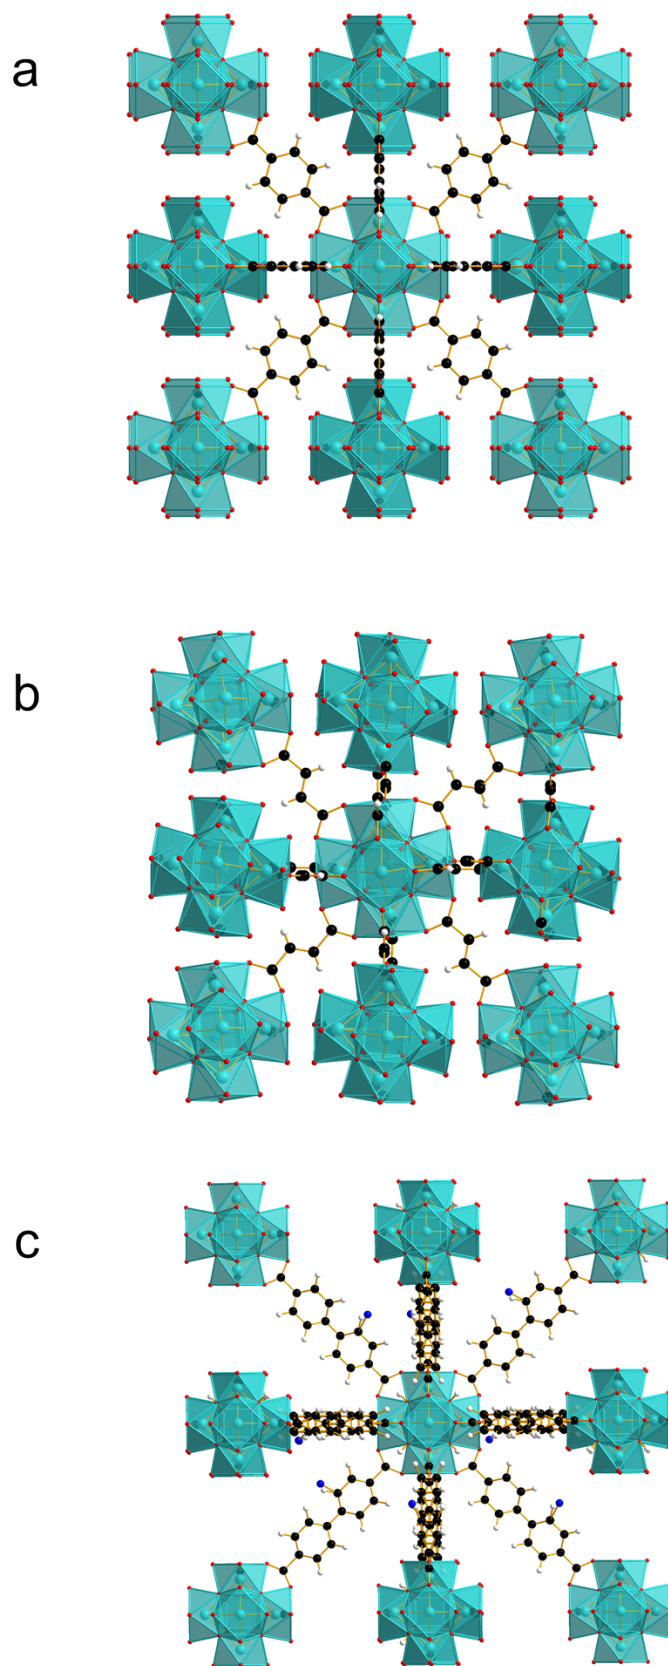

Figure S1. Atomic-level structures of (a) UiO-66<sup>1</sup>, (b) UiO-66-Fum<sup>2</sup> and (c) UiO-67-NH<sub>2</sub><sup>3</sup> determined by X-ray diffraction. The atoms are displayed with the following colors: zirconium in cyan, oxygen in red, carbon in black, nitrogen in blue, and hydrogen in gray. Furthermore, Zr<sub>6</sub>O<sub>4</sub>(OH)<sub>4</sub> clusters are displayed as cyan polyhedra.

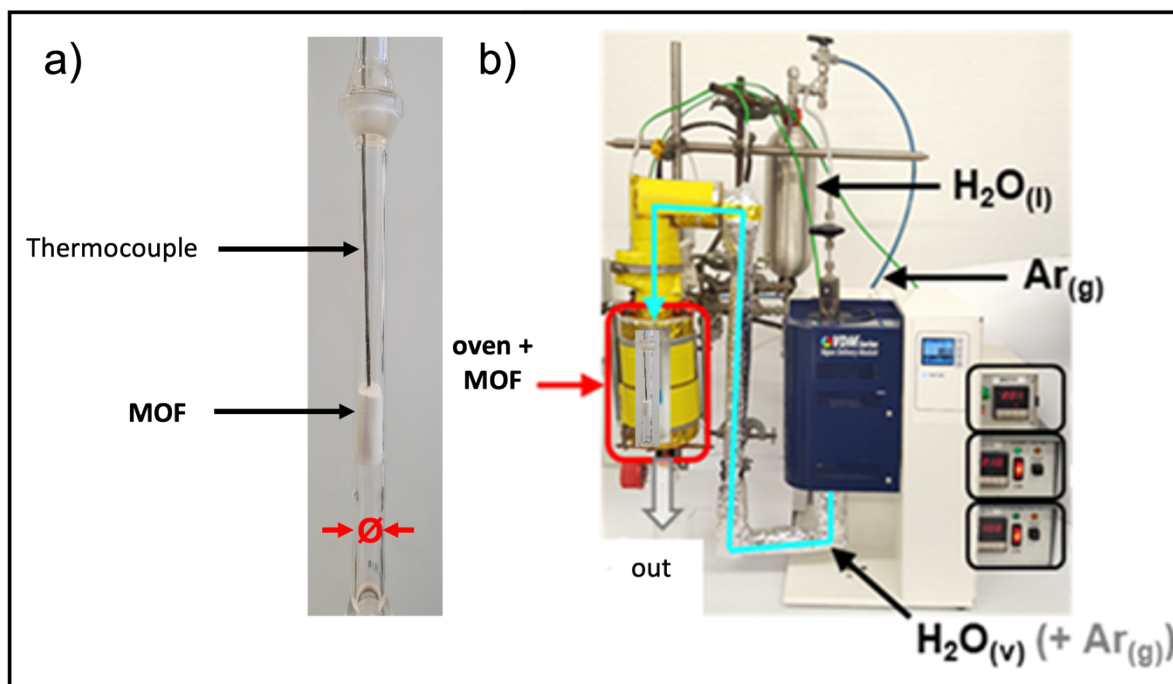

Figure S2. Experimental setup used to study the stability of MOF under steam flow at different temperatures.

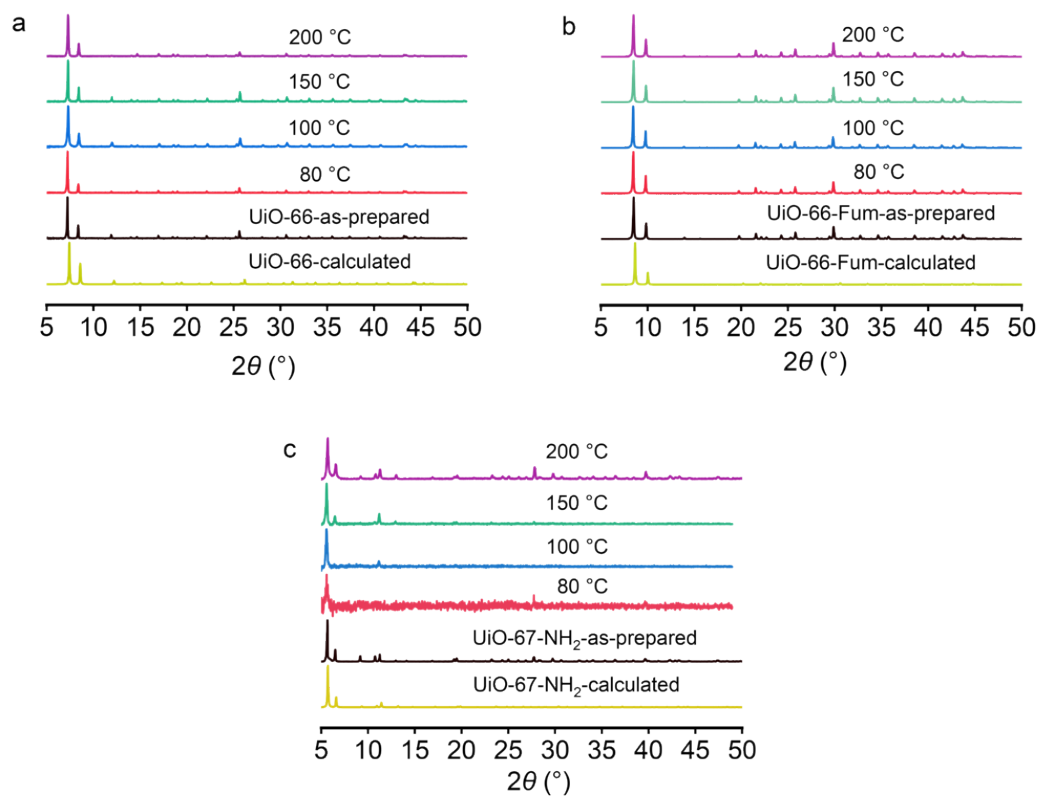

Figure S3. Comparison of experimental XRD patterns for the MOFs (a) UiO-66, (b) UiO-66-Fum, and (c) UiO-67-NH<sub>2</sub>; calculated from the crystalline structures reported literature, (see ref. 1 for UiO-66, 2 for UiO-66-Fum and 3 for UiO-67-NH<sub>2</sub>) (light green), as-prepared (black) and after steam treatment at 80 (red), 100 (blue), 150 (green) and 200 °C (purple). The water treatment lasted 7 days for UiO-66 and 24 h for UiO-66-Fum and UiO-67-NH<sub>2</sub>.

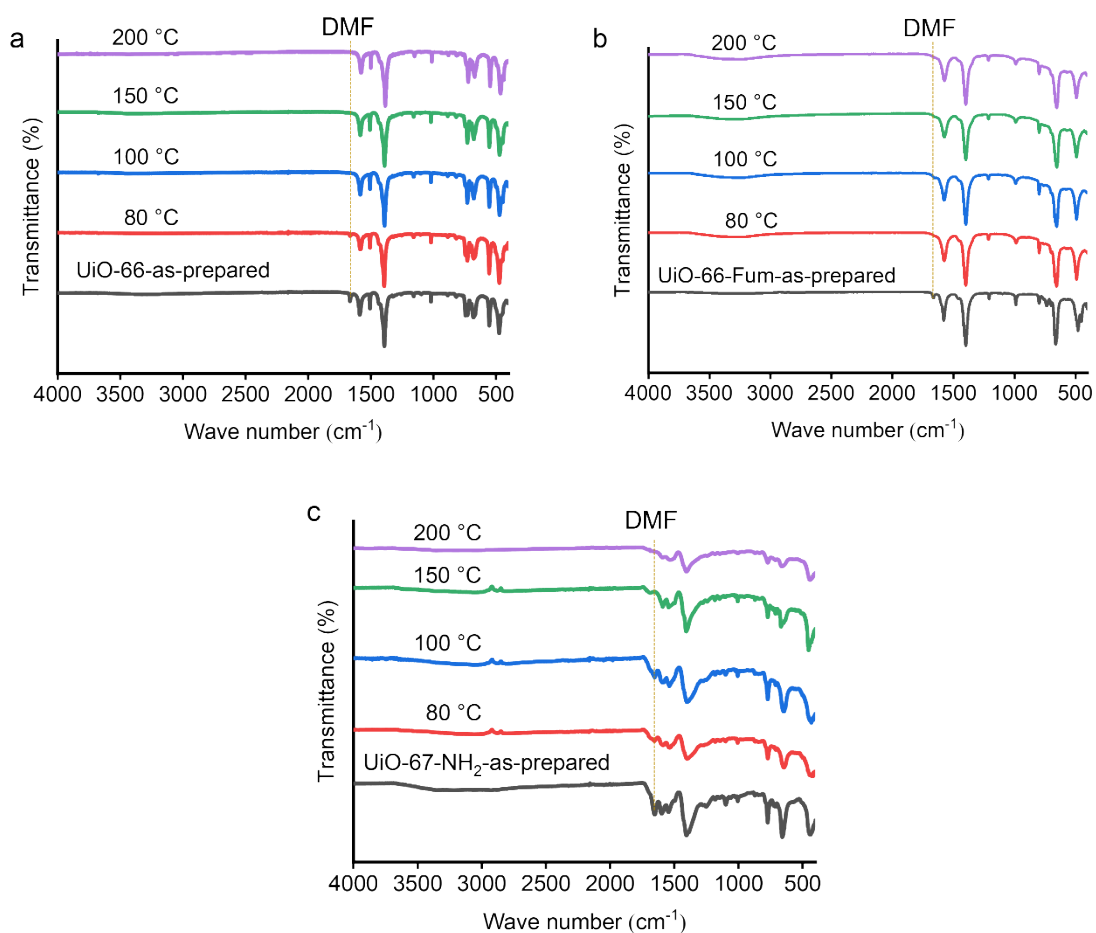

Figure S4. FTIR spectra of the three samples, (a) UiO-66, (b) UiO-66-Fum and (c) UiO-67-NH<sub>2</sub>: as prepared (in black), and after steam treatment at 80 (in red), 100 (in blue) 150 (in green) and 200 °C (purple).

For all samples, the O–H stretching band near 3600-3400 cm<sup>-1</sup> is broad and difficult to detect because of the adsorption of water and DMF in the pores.<sup>4</sup> IR spectra of the three MOFs are not significantly modified after the steam flow treatment. The main change for the three compounds is the decrease of the band at 1655 cm<sup>-1</sup> assigned to the stretching of C=O bond in DMF. This observation indicates that the DMF molecules used for washing of MOFs and adsorbed in the pores are removed by steam flow treatment.

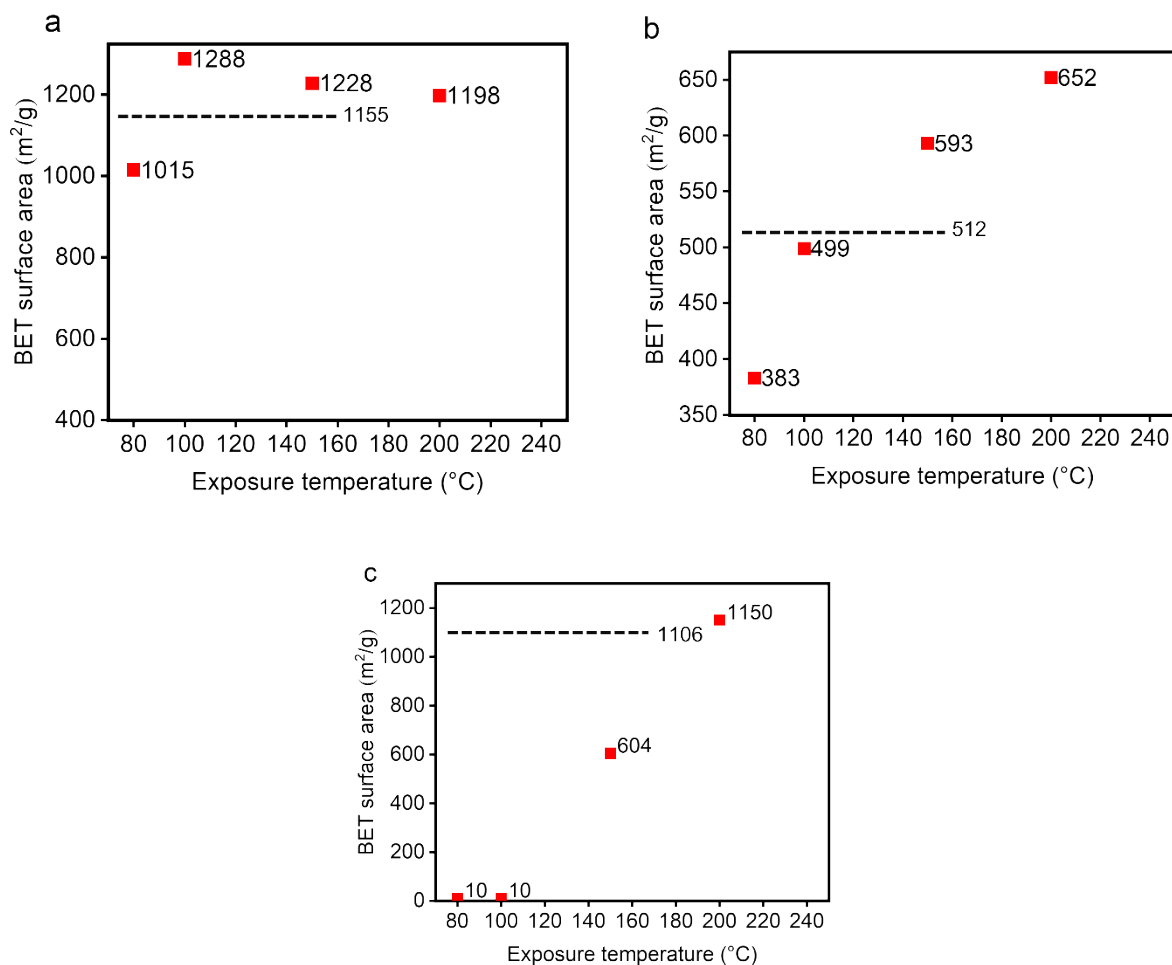

Figure S5. BET surface areas measured for the MOFs (a) UiO-66, (b) UiO-66-Fum and (c) UiO-67-NH<sub>2</sub> submitted to steam flows at temperatures ranging from 80 to 200 °C. The dashed line represents BET surface of the as-prepared sample.

The removal of adsorbed DMF (observed by IR) increases the BET surface areas of UiO-66, UiO-66-Fum and UiO-67-NH<sub>2</sub> treated by steam flows at temperatures greater than or equal to 100, 150 and 200 °C, respectively. Conversely, the treatment at 80 °C slightly reduces the BET surface areas of UiO-66 and UiO-66-Fum, probably owing to the condensation of water in the pores. For UiO-67-NH<sub>2</sub>, the BET surface area is significantly reduced at 150 °C and decreases by two orders of magnitude after steam flow treatment at 80 and 100 °C. This substantial drop in surface area indicates the collapse of the porous structure of this MOF when exposed to steam flow at 150 °C or lower.<sup>5</sup>

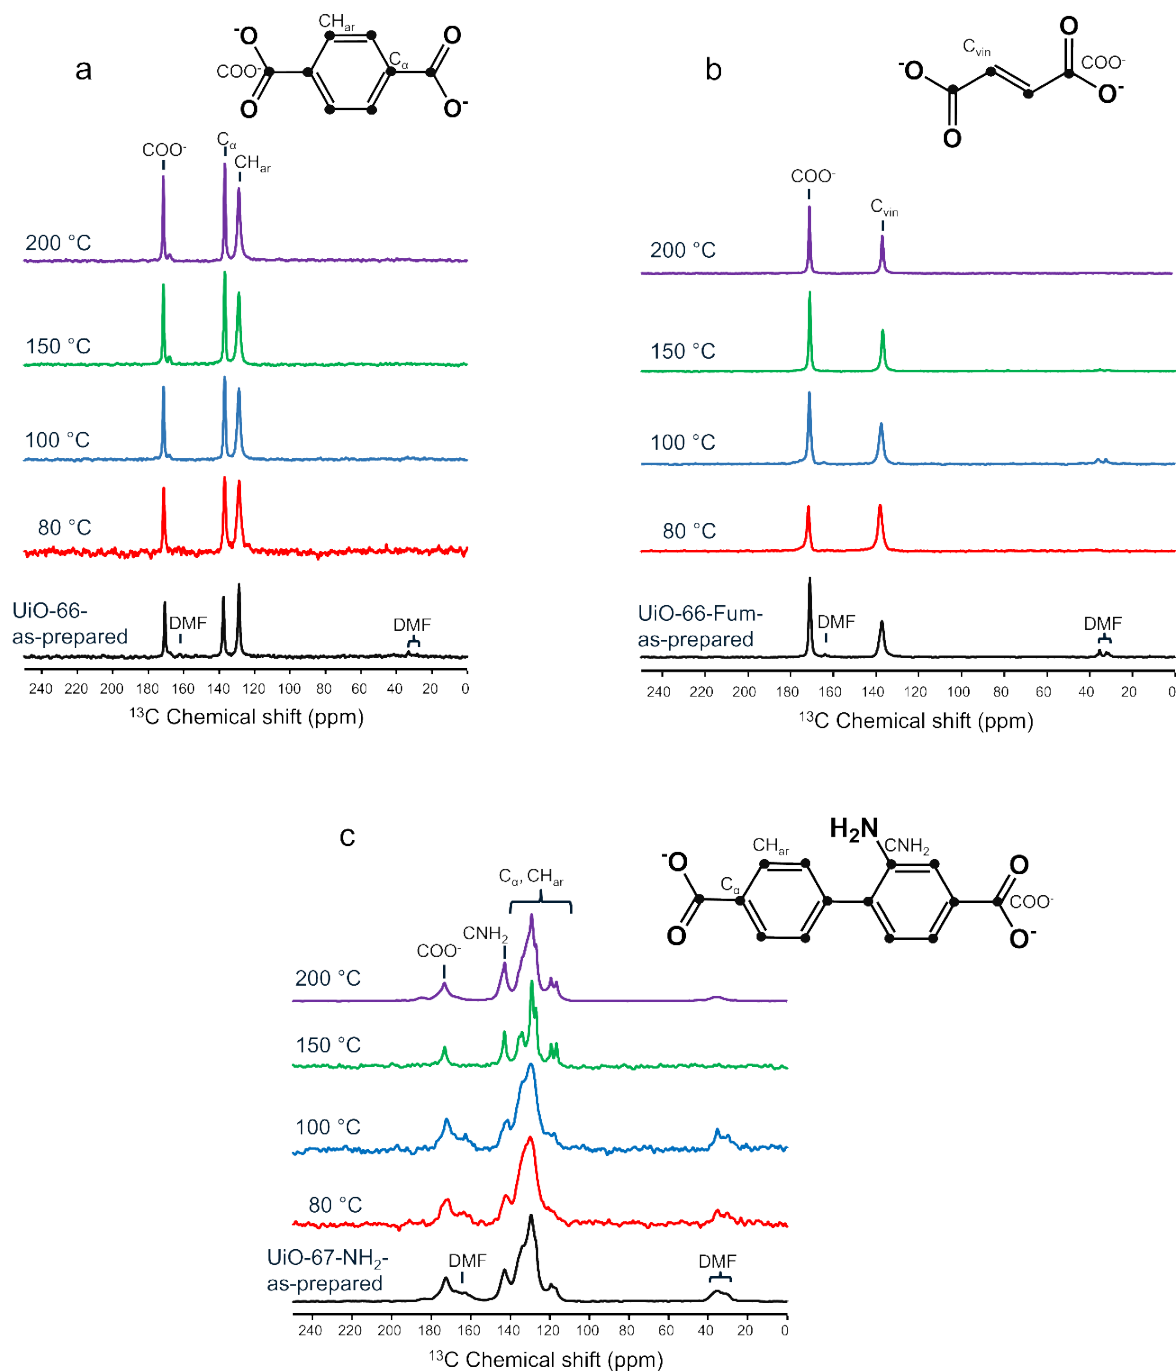

Figure S6. 1D  $^1\text{H} \rightarrow ^{13}\text{C}$  CPMAS of (a) UiO-66, (b) UiO-66-Fum and (c) UiO-67-NH<sub>2</sub>: as-prepared (black) and after steam treatment at 80 (red), 100 (blue), 150 (green) and 200°C (purple).

The 1D  $^1\text{H} \rightarrow ^{13}\text{C}$  CPMAS spectra of UiO-66 remain identical before and after steam treatment, which confirms the stability of this MOF under these conditions. We can only notice a drop in the signal-to-noise ratio after the treatment at 80 °C since the condensation of water in the pores accelerates the spin-lattice relaxation of protons in the rotating frame,  $T_{1\rho}(^1\text{H})$ , and hence, reduces the efficiency of the  $^1\text{H} \rightarrow ^{13}\text{C}$  polarization transfer. Weak signals of DMF are also visible but they disappear after steam flow treatment.

The 1D  $^1\text{H}\rightarrow^{13}\text{C}$  CPMAS spectra of UiO-66-Fum are dominated by the signals of the fumarate linkers. In agreement with  $^1\text{H}$  NMR data, signals of DMF (at 32.2, 35.4 and 163.8 ppm) are also visible in the as-prepared sample and those treated by steam flow at temperatures lower than or equal to 100 °C.

The 1D  $^1\text{H}\rightarrow^{13}\text{C}$  CPMAS spectra of UiO-67-NH<sub>2</sub> is dominated by the signals of the organic linker. DMF signals are also visible. A slight broadening of the signals appear at 80 and 100 °C, suggesting slight changes on the local environment in contrast with the spectra at 150 and 200 °C. This result leads to the conclusion that the ligand remains roughly intact after the different heat treatment.



Table S1. Zr-O bond distances of the Zr crystallographic site in the reported crystal structures of UiO-66, UiO-66-Fum and UiO-67-NH<sub>2</sub>.

| Bond distance (Å) | UiO-66 <sup>1</sup> | UiO-66-Fum <sup>2</sup> | UiO-67-NH <sub>2</sub> <sup>3</sup> |
|-------------------|---------------------|-------------------------|-------------------------------------|
| Zr-O1             | 2.06                | 2.06                    | 2.04                                |
| Zr-O2             | 2.06                | 2.07                    | 2.04                                |
| Zr-O3             | 2.21                | 2.22                    | 2.18                                |
| Zr-O4             | 2.21                | 2.22                    | 2.18                                |
| Zr-O5             | 2.25                | 2.27                    | 2.23                                |
| Zr-O6             | 2.25                | 2.27                    | 2.23                                |
| Zr-O7             | 2.25                | 2.27                    | 2.23                                |
| Zr-O8             | 2.25                | 2.27                    | 2.23                                |

Table S2. Number of detected echoes in the QCPMG experiments.

| Sample name                         | Number of detected echoes |
|-------------------------------------|---------------------------|
| UiO-66-as prepared                  | 50                        |
| UiO-66-80 °C                        | 50                        |
| UiO-66-100 °C                       | 200                       |
| UiO-66-150 °C                       | 200                       |
| UiO-66-200 °C                       | 50                        |
| UiO-66-Fum-as prepared              | 200                       |
| UiO-66-Fum-80 °C                    | 30                        |
| UiO-66-Fum-100 °C                   | 50                        |
| UiO-66-Fum-150 °C                   | 200                       |
| UiO-66-Fum-200 °C                   | 200                       |
| UiO-67-NH <sub>2</sub> -as prepared | 15                        |
| UiO-67-NH <sub>2</sub> -80 °C       | 2                         |
| UiO-67-NH <sub>2</sub> -100 °C      | 5                         |
| UiO-67-NH <sub>2</sub> -150 °C      | 10                        |
| UiO-67-NH <sub>2</sub> -200 °C      | 10                        |

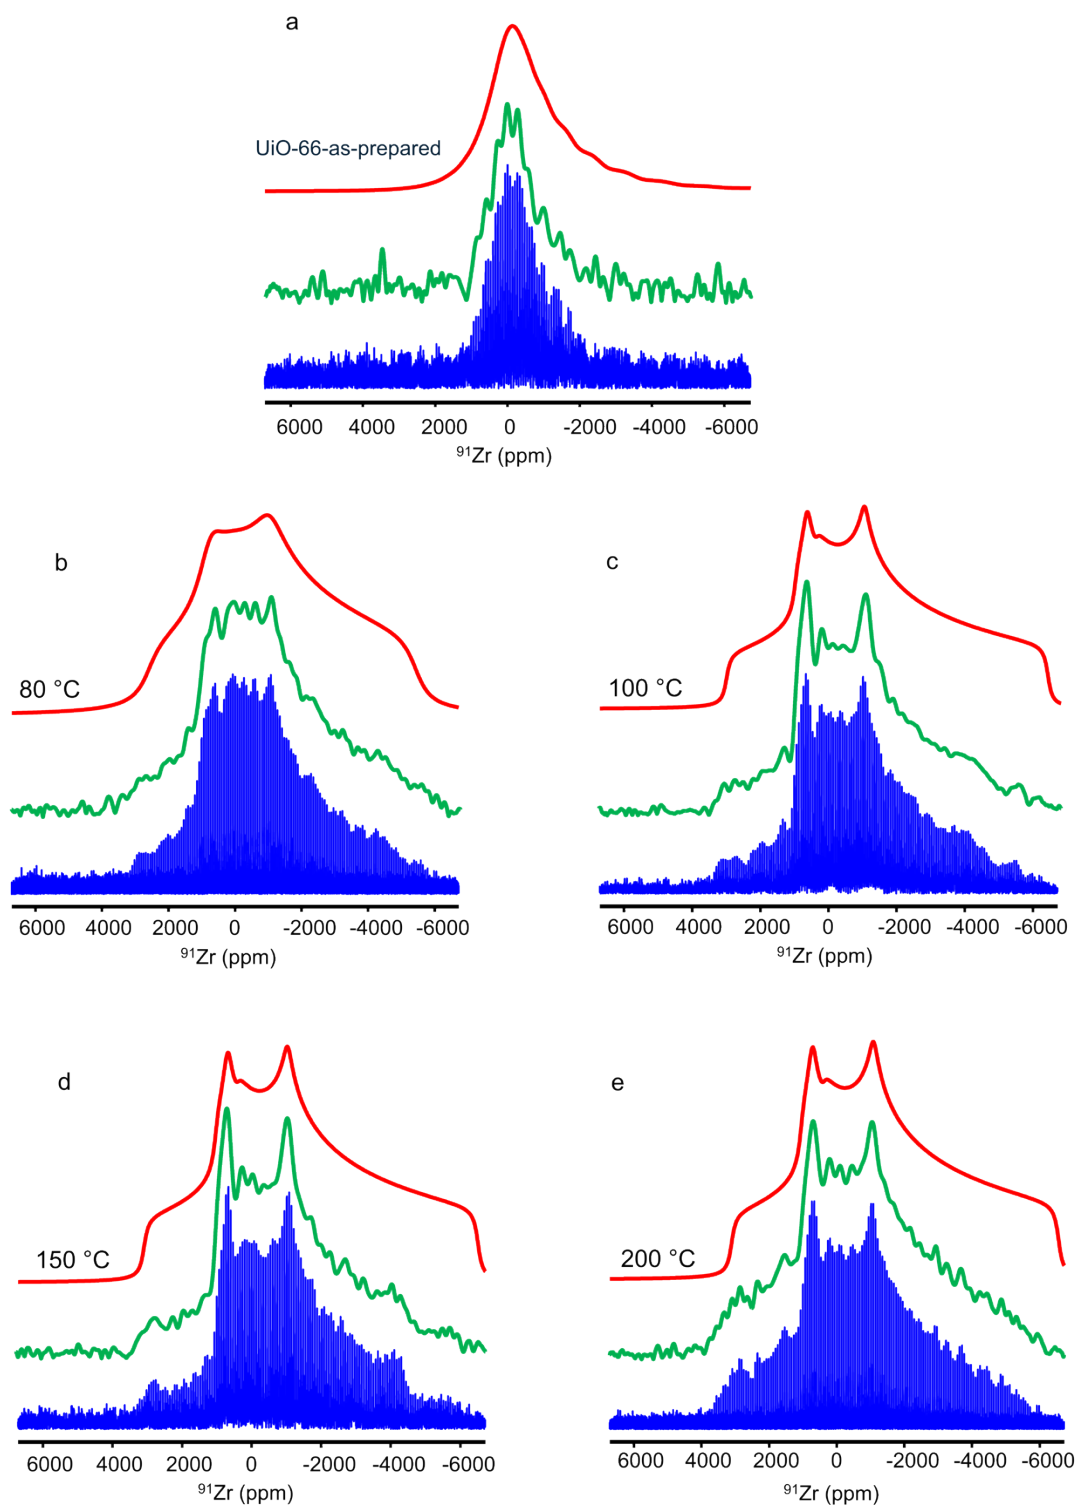

Figure S7. Experimental 1D  $^{91}\text{Zr}$  WURST-QCPMG NMR spectra of UiO-66: (a) as-prepared or after steam flow treatment at (b) 80, (c) 100, (d) 150 and (e) 200 °C. The spikelet spectra in blue are obtained by the FT of the echo train and are identical to those displayed in Figures 3a and 4, whereas the envelopes in green results from the FT of the sum of the echoes. The red spectra correspond to the simulation using dmfit software.

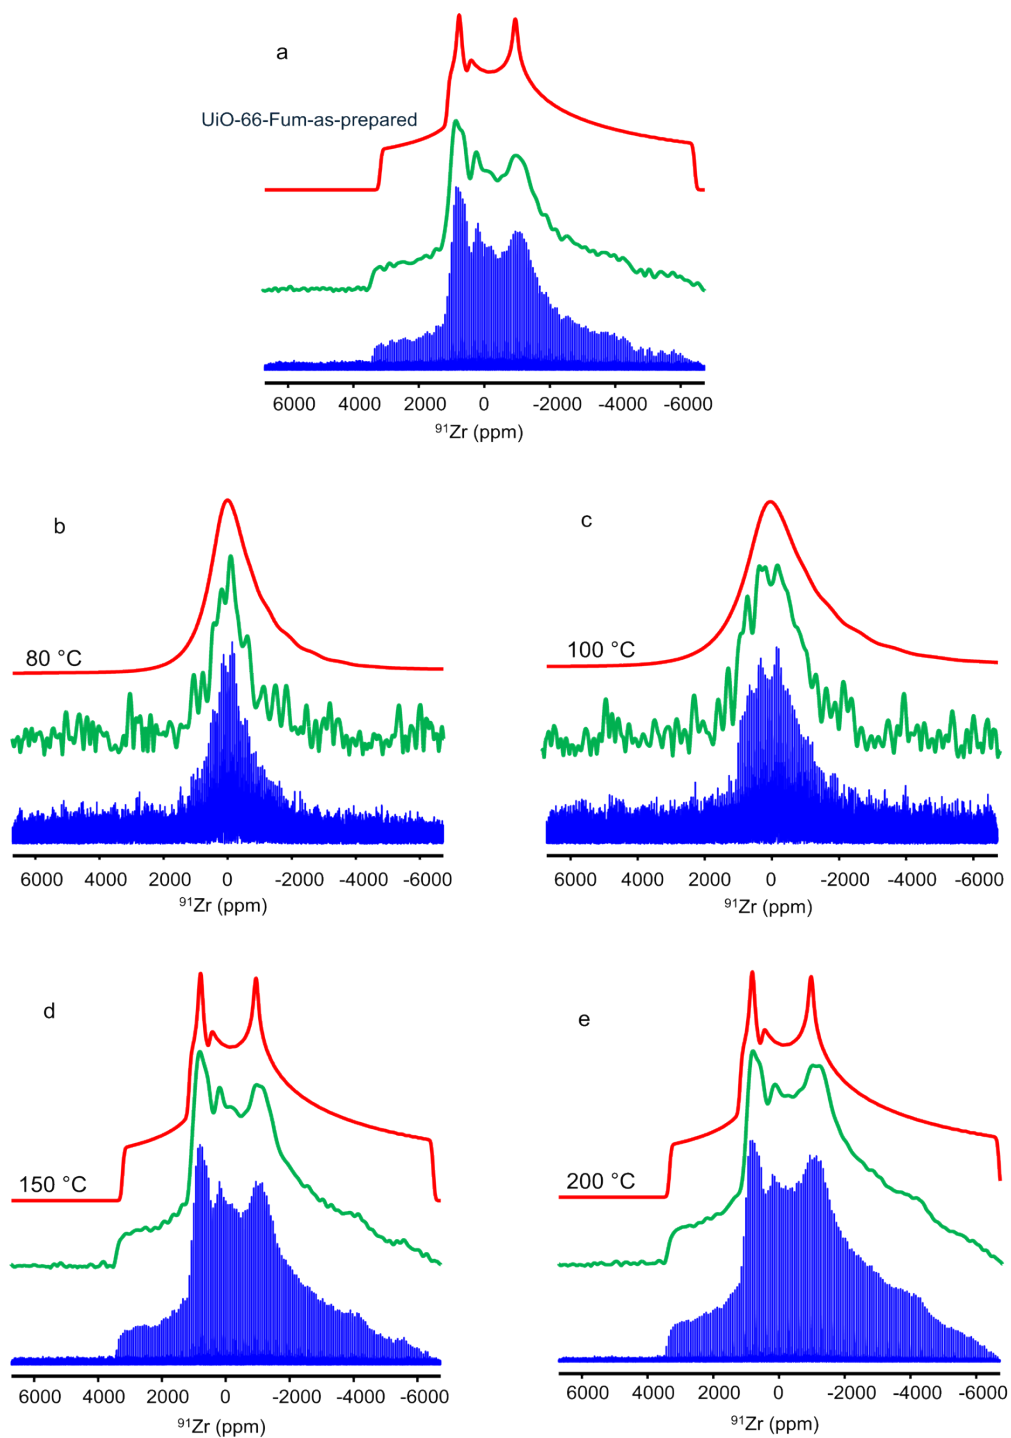

Figure S8. Experimental 1D  $^{91}\text{Zr}$  WURST-QCPMG NMR spectra of UiO-66-Fum: (a) as-prepared or after steam flow treatment at (b) 80, (c) 100, (d) 150 and (e) 200 °C. The spikelet spectra in blue are obtained by the FT of the echo train and are identical to those displayed in Figures 3b and 5, whereas the envelopes in green results from the FT of the sum of the echoes. The red spectra correspond to the simulation using dmfit software.

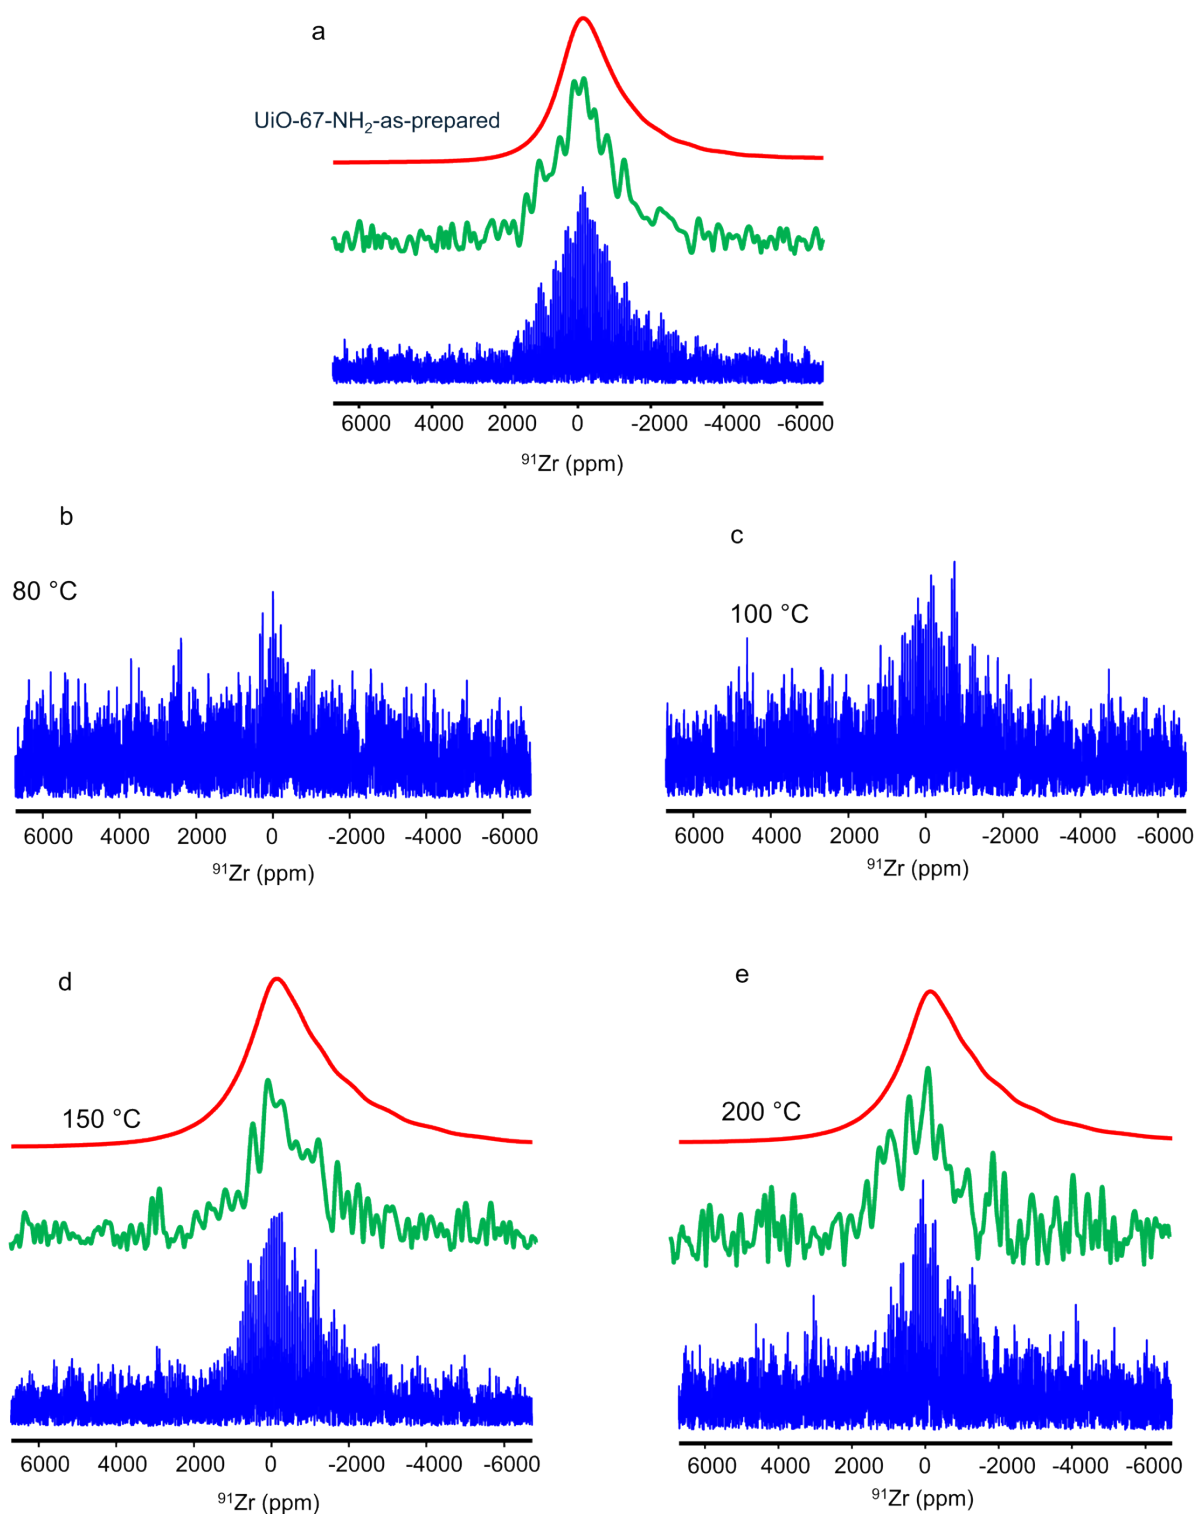

Figure S9. Experimental 1D  $^{91}\text{Zr}$  WURST-QCPMG NMR spectra of UiO-67-NH<sub>2</sub>: (a) as-prepared or after steam flow treatment at (b) 80, (c) 100, (d) 150 and (e) 200 °C. The spikelet spectra in blue are obtained by the FT of the echo train and are identical to those displayed in Figures 3c and 6, whereas the envelopes in green results from the FT of the sum of the echoes. The red spectra correspond to the simulation using dmfit software.

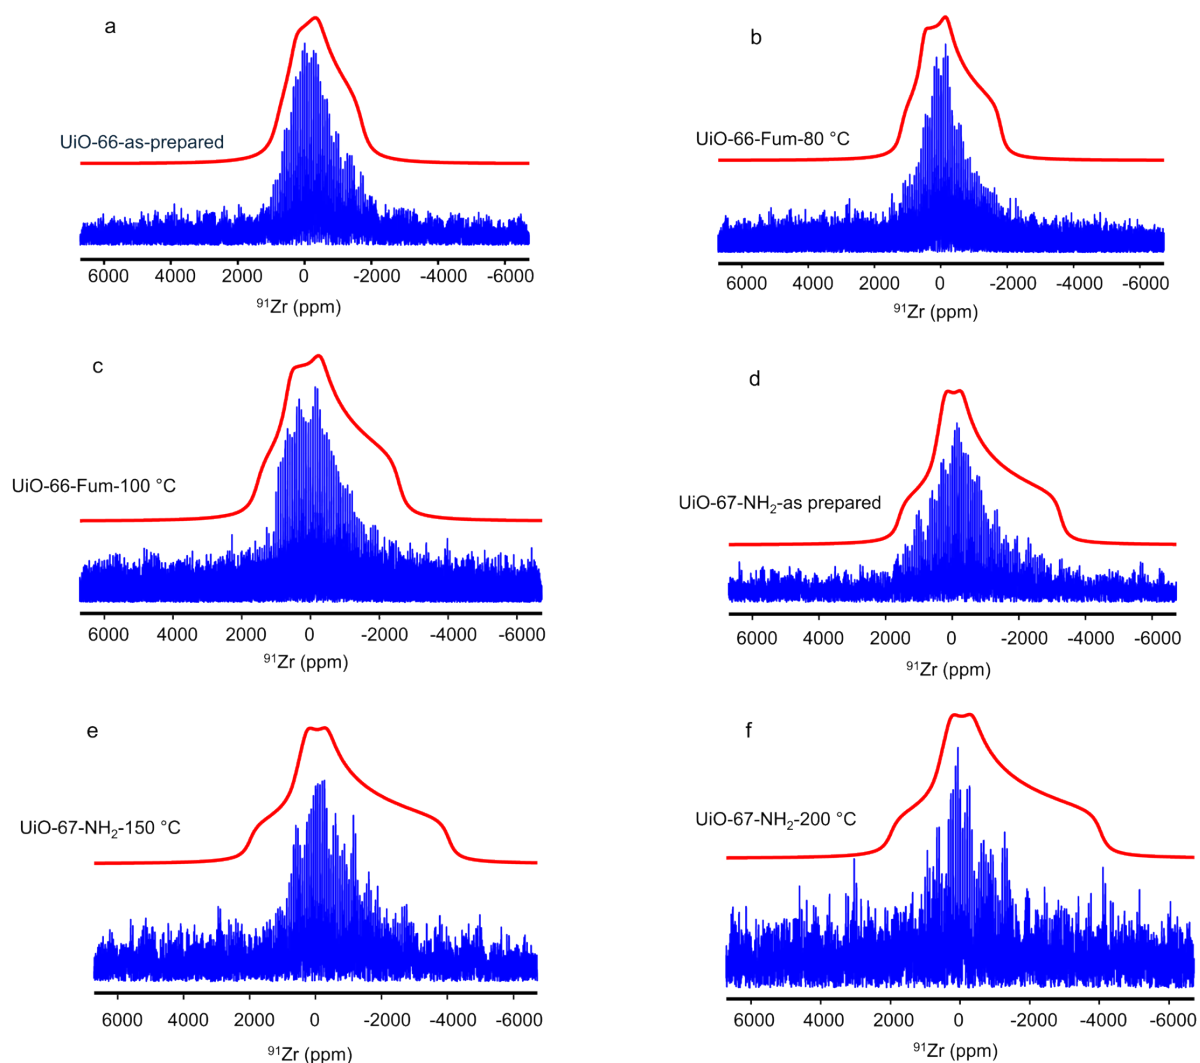

Figure S10. Experimental 1D  $^{91}\text{Zr}$  WURST-QCPMG NMR spectra of (a) as-prepared UiO-66, (b-c) UiO-66-Fum after steam flow at (b) 80 and (c) 100 °C and (d-f) UiO-67-NH<sub>2</sub>: (d) as-prepared and after steam flow at (e) 150 and (f) 200 °C. The spikelet spectra in blue are obtained by the FT of the echo train and are identical to those displayed in Figures 3 to 6. The red spectra correspond to the simulation using dmfit software and a quadrupolar lineshape for a single site, whereas Czjzek model was employed to simulate these spectra in other figures. The best-fit NMR parameters corresponding to the simulations displayed in this figure are shown in Table S3.

Table S3. Best-fit NMR parameters to simulate the experimental 1D  $^{91}\text{Zr}$  WURST-QCPMG NMR spectra of Figure S10 using a quadrupolar lineshape of a single site.

| Sample                 | Temperature of steam treatment (°C) | $\delta_{\text{iso}}$ (ppm) | $C_Q$ (MHz) | $\eta_Q$ |
|------------------------|-------------------------------------|-----------------------------|-------------|----------|
| UiO-66                 | As-prepared                         | -26 ( $\pm$ 50)             | 16.8        | 0.65     |
| UiO-66-Fum             | 80                                  | 120 ( $\pm$ 80)             | 18.0        | 0.70     |
|                        | 100                                 | 170 ( $\pm$ 50)             | 21.0        | 0.72     |
| UiO-67-NH <sub>2</sub> | As-prepared                         | -20 ( $\pm$ 100)            | 22          | 0.85     |
|                        | 150                                 | -25 ( $\pm$ 100)            | 24.5        | 0.85     |
|                        | 200                                 | -25 ( $\pm$ 100)            | 24.5        | 0.85     |

Table S4. Calculated  $^{91}\text{Zr}$  NMR parameters of UiO-66-Fum.

|      | $\delta_{\text{iso}}$ (ppm) | $C_Q$ (MHz) | $\eta_Q$ | $\delta_{11}$ (ppm) | $\delta_{22}$ (ppm) | $\delta_{33}$ (ppm) |
|------|-----------------------------|-------------|----------|---------------------|---------------------|---------------------|
| Zr1  | -45                         | 27.3        | 0.7      | -152                | -113                | 130                 |
| Zr2  | -48                         | 27.2        | 0.8      | -156                | -111                | 123                 |
| Zr3  | -48                         | 27.4        | 0.7      | -156                | -112                | 125                 |
| Zr4  | -45                         | 27.3        | 0.7      | -152                | -113                | 130                 |
| Zr5  | -48                         | 27.2        | 0.8      | -156                | -112                | 123                 |
| Zr6  | -48                         | 27.4        | 0.8      | -156                | -112                | 124                 |
| Zr7  | -45                         | 27.3        | 0.7      | -153                | -113                | 130                 |
| Zr8  | -48                         | 27.2        | 0.8      | -156                | -112                | 123                 |
| Zr9  | -47                         | 27.4        | 0.8      | -155                | -111                | 125                 |
| Zr10 | -45                         | 27.3        | 0.7      | -153                | -113                | 130                 |
| Zr11 | -48                         | 27.5        | 0.7      | -156                | -112                | 124                 |
| Zr12 | -46                         | 27.2        | 0.7      | -152                | -113                | 128                 |
| Zr13 | -48                         | 27.5        | 0.7      | -156                | -112                | 124                 |
| Zr14 | -48                         | 27.2        | 0.8      | -156                | -112                | 123                 |
| Zr15 | -46                         | 27.5        | 0.7      | -152                | -114                | 129                 |
| Zr16 | -46                         | 27.2        | 0.7      | -153                | -113                | 128                 |
| Zr17 | -45                         | 27.5        | 0.7      | -152                | -114                | 129                 |
| Zr18 | -48                         | 27.4        | 0.7      | -156                | -112                | 125                 |
| Zr19 | -48                         | 27.6        | 0.7      | -155                | -112                | 125                 |
| Zr20 | -45                         | 27.5        | 0.7      | -152                | -114                | 130                 |
| Zr21 | -46                         | 27.2        | 0.7      | -153                | -113                | 128                 |
| Zr22 | -48                         | 27.5        | 0.8      | -155                | -112                | 124                 |
| Zr23 | -46                         | 27.2        | 0.7      | -153                | -114                | 128                 |
| Zr24 | -46                         | 27.5        | 0.7      | -152                | -114                | 129                 |

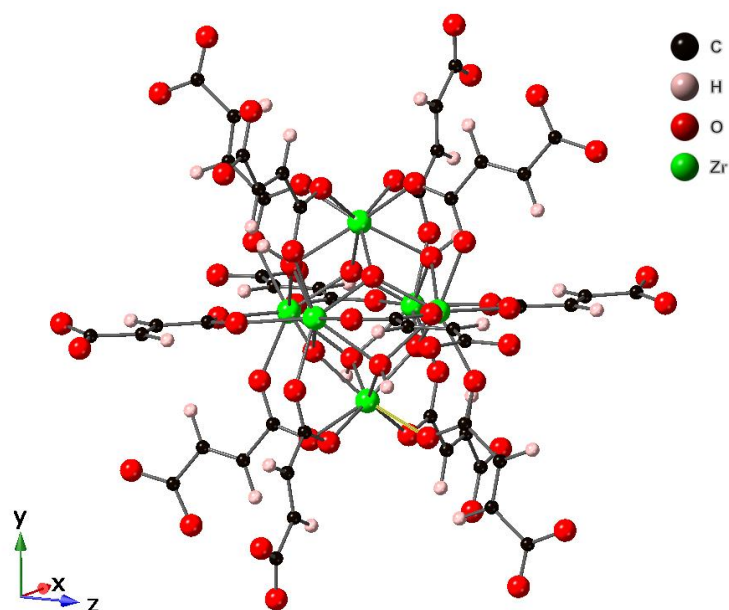

Figure S11. Atomic-level positions of UiO-66-Fum after the optimization of the structure (see main text for details).

Table S5. Calculated  $^{91}\text{Zr}$  NMR parameters of UiO-66-Fum- $\text{H}_2\text{O}$ .

|      | $\delta_{\text{iso}}$ (ppm) | $C_Q$ (MHz) | $\eta_Q$ | $\delta_{11}$ (ppm) | $\delta_{22}$ (ppm) | $\delta_{33}$ (ppm) |
|------|-----------------------------|-------------|----------|---------------------|---------------------|---------------------|
| Zr1  | -53                         | 27.4        | 0.8      | -164                | -114                | 118                 |
| Zr2  | -49                         | 25.7        | 0.9      | -164                | -115                | 130                 |
| Zr3  | -45                         | 25.9        | 0.8      | -158                | -112                | 134                 |
| Zr4  | -46                         | 25.6        | 0.9      | -156                | -107                | 126                 |
| Zr5  | -54                         | 25.9        | 0.8      | -169                | -119                | 127                 |
| Zr6  | -49                         | 26.7        | 0.9      | -158                | -107                | 120                 |
| Zr7  | -46                         | 27.3        | 0.7      | -159                | -112                | 132                 |
| Zr8  | -44                         | 27.7        | 0.7      | -146                | -110                | 123                 |
| Zr9  | -51                         | 26.3        | 0.9      | -162                | -110                | 120                 |
| Zr10 | -49                         | 28.1        | 0.8      | -161                | -111                | 124                 |
| Zr11 | -51                         | 26.3        | 0.8      | -167                | -118                | 131                 |
| Zr12 | -48                         | 26.9        | 0.7      | -161                | -115                | 131                 |
| Zr13 | -46                         | 26.7        | 0.8      | -155                | -108                | 125                 |
| Zr14 | -49                         | 27.3        | 0.8      | -159                | -110                | 122                 |
| Zr15 | -44                         | 26.4        | 0.8      | -151                | -108                | 127                 |
| Zr16 | -46                         | 27.2        | 0.8      | -155                | -107                | 125                 |
| Zr17 | -44                         | 26.1        | 0.8      | -151                | -108                | 128                 |
| Zr18 | -52                         | 26.4        | 0.9      | -163                | -111                | 119                 |
| Zr19 | -46                         | 27.1        | 0.8      | -160                | -108                | 130                 |
| Zr20 | -47                         | 26.0        | 0.9      | -158                | -112                | 128                 |
| Zr21 | -50                         | 26.7        | 0.7      | -163                | -116                | 129                 |
| Zr22 | -55                         | 27.2        | 0.8      | -165                | -113                | 115                 |
| Zr23 | -45                         | 26.7        | 0.7      | -157                | -112                | 134                 |
| Zr24 | -45                         | 27.4        | 0.8      | -155                | -107                | 126                 |

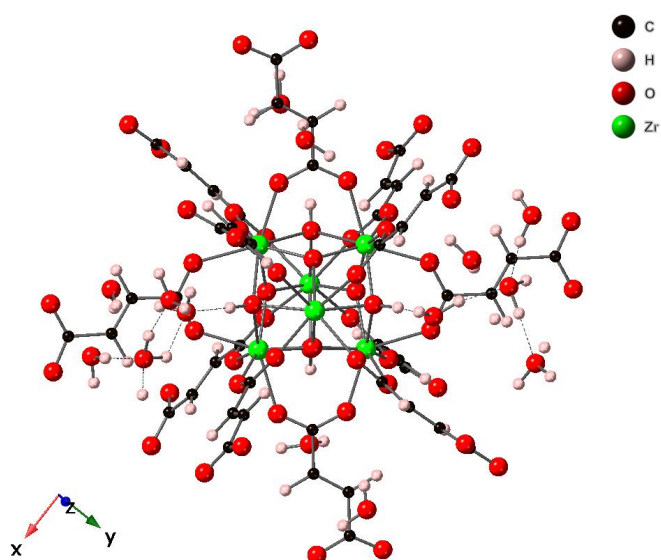

Figure S12. Atomic-level positions of UiO-66-Fum- $\text{H}_2\text{O}$  after the optimization of the structure (see main text for details).

Table S6. Calculated  $^{91}\text{Zr}$  NMR parameters of UiO-67-NH<sub>2</sub>.

|     | $\delta_{\text{iso}}$ (ppm) | $C_Q$ (MHz) | $\eta_Q$ | $\delta_{11}$ (ppm) | $\delta_{22}$ (ppm) | $\delta_{33}$ (ppm) |
|-----|-----------------------------|-------------|----------|---------------------|---------------------|---------------------|
| Zr1 | -56                         | 29.4        | 0.6      | -170                | -128                | 129                 |
| Zr2 | -56                         | 29.1        | 0.6      | -170                | -128                | 131                 |
| Zr3 | -56                         | 26.7        | 0.8      | -165                | -127                | 126                 |
| Zr4 | -54                         | 25.9        | 0.8      | -165                | -127                | 131                 |
| Zr5 | -55                         | 25.8        | 0.8      | -164                | -126                | 126                 |
| Zr6 | -55                         | 26.8        | 0.7      | -165                | -128                | 128                 |

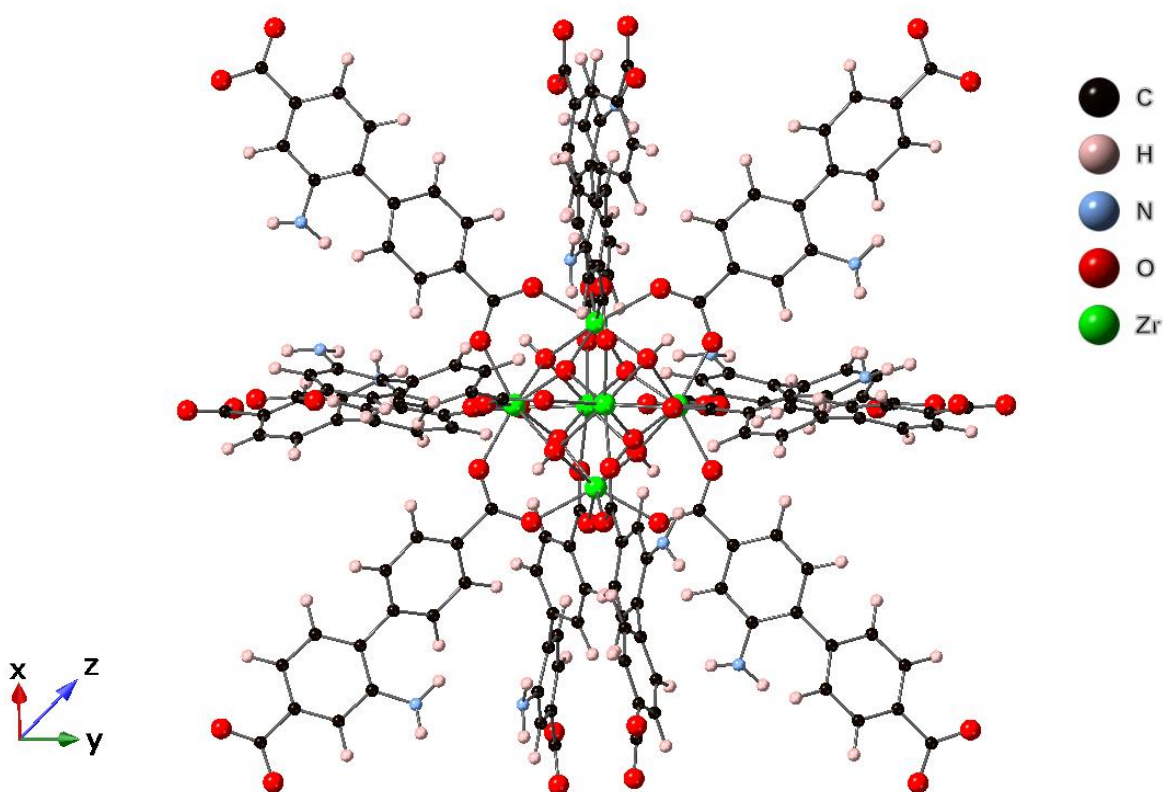

Figure S13. Atomic-level positions of UiO-67-NH<sub>2</sub> after the optimization of the structure (see main text for details).



Table S7. List of reference structures used to estimate the precision of calculated  $\delta_{\text{iso}}(^{91}\text{Zr})$  and  $C_Q(^{91}\text{Zr})$  values by comparing experimental and DFT calculated NMR parameters

|                    | ICSD Code   | $\sigma_{\text{iso}}$ calc. (ppm) | $\delta_{\text{iso}}$ exp. (ppm) | $ C_Q $ calc. (MHz) | $C_Q$ exp. (MHz)  |
|--------------------|-------------|-----------------------------------|----------------------------------|---------------------|-------------------|
| ZrO <sub>2</sub>   | 62993       | 1832                              | 96 <sup>6</sup>                  | 19.4                | 23.4 <sup>6</sup> |
| BaZrO <sub>3</sub> | 97459       | 1621                              | 316 <sup>6</sup>                 | -                   | -                 |
| ZrSiO <sub>4</sub> | 71943       | 1983                              | -74 <sup>6</sup>                 | 20.8                | 20.5 <sup>6</sup> |
| SrZrO <sub>3</sub> | 650         | 1659                              | 290 <sup>7</sup>                 | 6.3                 | 4.3 <sup>8</sup>  |
| MIL140A            | CCDC 905026 | 1889                              | 100 <sup>9</sup>                 | 35.4                | 35.0 <sup>9</sup> |

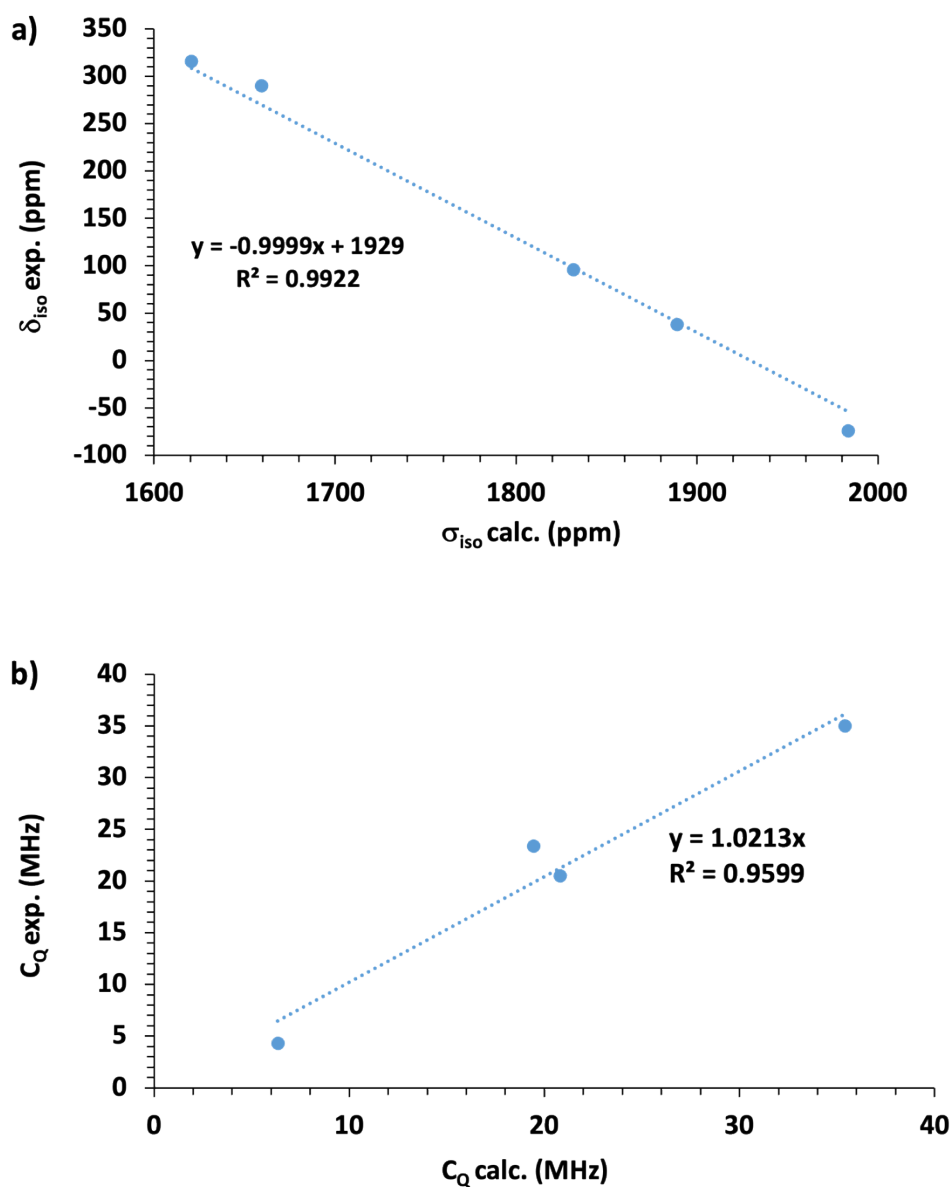

Figure S14. (a) Experimental  $\delta_{\text{iso}}(^{91}\text{Zr})$  values (in ppm) vs calculated  $\sigma_{\text{iso}}$  (b) Experimental  $C_Q$  values (in MHz) vs calculated ones

## References

- (1) Oien, S.; Wragg, D.; Reinsch, H.; Svelle, S.; Bordiga, S.; Lamberti, C.; Lillerud, K. P. Detailed Structure Analysis of Atomic Positions and Defects in Zirconium Metal-Organic Frameworks. *Cryst. Growth Des.* **2014**, *14* (11), 5370-5372. DOI: 10.1021/cg501386j.
- (2) Furukawa, H.; Gándara, F.; Zhang, Y. B.; Jiang, J. C.; Queen, W. L.; Hudson, M. R.; Yaghi, O. M. Water Adsorption in Porous Metal-Organic Frameworks and Related Materials. *J. Am. Chem. Soc.* **2014**, *136* (11), 4369-4381. DOI: 10.1021/ja500330a.
- (3) Goodenough, I.; Devulapalli, V. S. D.; Xu, W.; Boyanich, M. C.; Luo, T.-Y.; De Souza, M.; Richard, M.; Rosi, N. L.; Borguet, E. Interplay between Intrinsic Thermal Stability and Expansion Properties of Functionalized UiO-67 Metal-Organic Frameworks. *Chem. Mater.* **2021**, *33* (3), 910-920. DOI: 10.1021/acs.chemmater.0c03889.
- (4) Valenzano, L.; Civalleri, B.; Chavan, S.; Bordiga, S.; Nilsen, M. H.; Jakobsen, S.; Lillerud, K. P.; Lamberti, C. Disclosing the complex structure of UiO-66 metal organic framework: A synergic combination of experiment and theory. *Chem. Mater.* **2011**, *23* (7), 1700-1718. DOI: 10.1021/cm1022882 Scopus.
- (5) Giovine, R.; Pourpoint, F.; Duval, S.; Lafon, O.; Amoureux, J. P.; Loiseau, T.; Volkringer, C. The Surprising Stability of Cu<sub>3</sub>(btc)<sub>2</sub> Metal-Organic Framework under Steam Flow at High Temperature. *Cryst. Growth Des.* **2018**, *18* (11), 6681-6693. DOI: 10.1021/acs.cgd.8b00931.
- (6) Lapina, O. B.; Khabibulin, D. F.; Terskikh, V. V. Multinuclear NMR study of silica fiberglass modified with zirconia. *Solid State Nucl. Magn. Reson.* **2011**, *39* (3-4), 47-57. DOI: 10.1016/j.ssnmr.2010.12.002.
- (7) Czernek, J.; Kobera, L.; Havlák, L.; Czerneková, V.; Rohlíček, J.; Bárta, J.; Brus, J. Probing the <sup>91</sup>Zr NMR parameters in the solid state by a combination of DFT calculations and experiments. *Chem. Phys. Lett.* **2020**, *738*, 136855. DOI: 10.1016/j.cplett.2019.136855.
- (8) Rebaza, A.; Navarro, A.; Taylor, M.; Errico, A.; Cottenier, S. Hyperfine properties at Zr sites of Zr-based compounds. A DFT FP-LAPW and GIPAW study. *Phys. B- Condensed Matter* **2023**, *657*, 414757. DOI: 10.1016/j.physb.2023.414757.
- (9) He, P.; Lucier, B. E. G.; Terskikh, V. V.; Shi, Q.; Dong, J. X.; Chu, Y. Y.; Zheng, A. M.; Sutrisno, A.; Huang, Y. N. Spies Within Metal-Organic Frameworks: Investigating Metal Centers Using Solid-State NMR. *J. Phys. Chem. C* **2014**, *118* (41), 23728-23744. DOI: 10.1021/jp5063868.
